# Supplementary material
Source: PubMed Central journal article supplement (PMC8040322)
Supplement: mmc3.pdf [file mmc3.pdf]

**Supplementary table 1.** Thematic analysis of free-text answers by patients

| Topic addressed in open field text answers                               | Number of items (%) |
|--------------------------------------------------------------------------|---------------------|
| <b>Positive experience</b>                                               | <b>114 (31.1%)</b>  |
| General satisfaction                                                     | 78                  |
| Benefits                                                                 | 32                  |
| Support                                                                  | 4                   |
| <b>General concerns</b>                                                  | <b>105 (28.6%)</b>  |
| Reason for consultation                                                  | 33                  |
| Physical examination                                                     | 22                  |
| Missing the physical interaction                                         | 19                  |
| Needed support                                                           | 11                  |
| Digital skills healthcare provider                                       | 6                   |
| Felt the need to make eye contact                                        | 3                   |
| <b>Technical problem</b>                                                 | <b>78 (21.3%)</b>   |
| Quality of the audio                                                     | 26                  |
| Quality with establishing a connection                                   | 17                  |
| General technical problem                                                | 17                  |
| Quality of the video                                                     | 9                   |
| Hardware: use of PC/laptop                                               | 4                   |
| Healthcare provider                                                      | 2                   |
| Difficulty to log in                                                     | 3                   |
| <b>Recommendations</b>                                                   | <b>70 (19.1%)</b>   |
| Availability on PC/Laptop                                                | 22                  |
| Hardware: size and lay out of screen                                     | 16                  |
| Wish for virtual waiting room                                            | 8                   |
| Option to share screen of provider                                       | 6                   |
| User interface                                                           | 5                   |
| Use of VC as a supplement rather than a replacement of care              | 4                   |
| Workflow                                                                 | 4                   |
| Support                                                                  | 3                   |
| Availability of multidisciplinary consultation with more than 1 provider | 2                   |
