# Supplementary material
Source: PubMed Central journal article supplement (PMC8040322)
Supplement: mmc4.pdf [file mmc4.pdf]

**Supplementary table 2.** Thematic analysis of free-text answers by care providers

| Topic addressed in open field text answers                               | Number of items<br>(% of total items) |
|--------------------------------------------------------------------------|---------------------------------------|
| <b>Positive experience</b>                                               | <b>99 (45.8%)</b>                     |
| Visual cues                                                              | 32                                    |
| Benefits patients                                                        | 22                                    |
| Usability                                                                | 18                                    |
| Technology                                                               | 16                                    |
| Continue provision of healthcare                                         | 8                                     |
| Support                                                                  | 3                                     |
| <b>Technical problem</b>                                                 | <b>42 (19.4%)</b>                     |
| Workflow                                                                 | 15                                    |
| Quality of the audio                                                     | 10                                    |
| Quality with establishing a connection                                   | 12                                    |
| Quality of the video                                                     | 5                                     |
| <b>General concerns</b>                                                  | <b>34 (15.7%)</b>                     |
| Digital literacy patients                                                | 22                                    |
| Missing the physical interaction                                         | 12                                    |
| <b>Recommendations</b>                                                   | <b>41 (18.9%)</b>                     |
| Missing functionalities                                                  | 15                                    |
| Hardware: use of PC/laptop, bigger screen, Android devices               | 13                                    |
| Availability on PC/Laptop                                                | 5                                     |
| Wish for virtual waiting room                                            | 3                                     |
| Hardware: size and lay out of screen                                     | 2                                     |
| Option to share screen of provider                                       | 2                                     |
| Availability of multidisciplinary consultation with more than 1 provider | 1                                     |
